# Supplementary material for: The Effect of the Time Interval Between Radiation and Hyperthermia on Clinical Outcome in 400 Locally Advanced Cervical Carcinoma Patients
Source: PubMed Central journal article supplement (PMC6418024; doi:10.3389/fonc.2019.00134), 2019-03-08

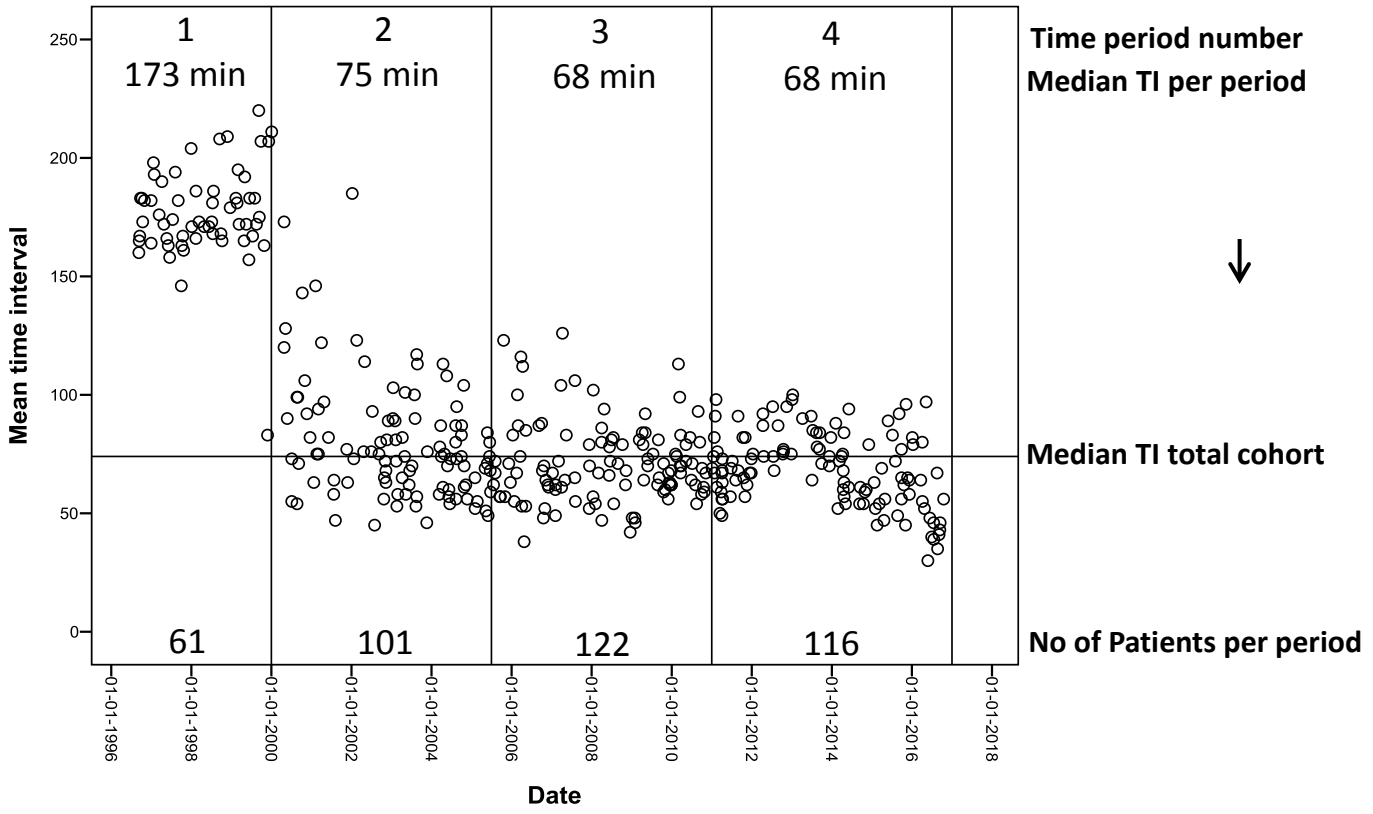

Supplement: Image_2.pdf [file Image_2.pdf]
