# Supplementary material for: The Effect of the Time Interval Between Radiation and Hyperthermia on Clinical Outcome in 400 Locally Advanced Cervical Carcinoma Patients
Source: PubMed Central journal article supplement (PMC6418024; doi:10.3389/fonc.2019.00134), 2019-03-08

**Time period 1; median 173 min.**

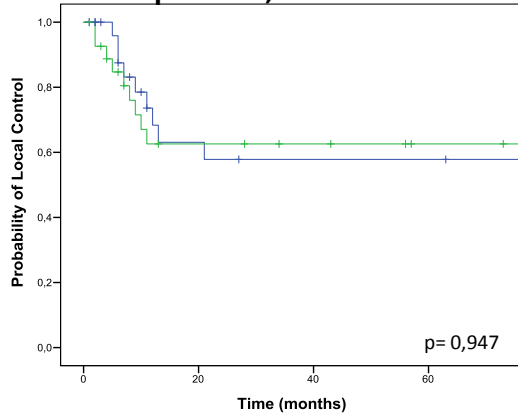

**Time period 2; median 75 min.**

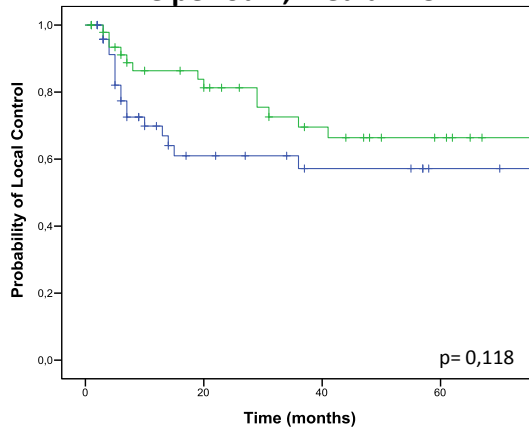

**Time period 3; median 68 min.**

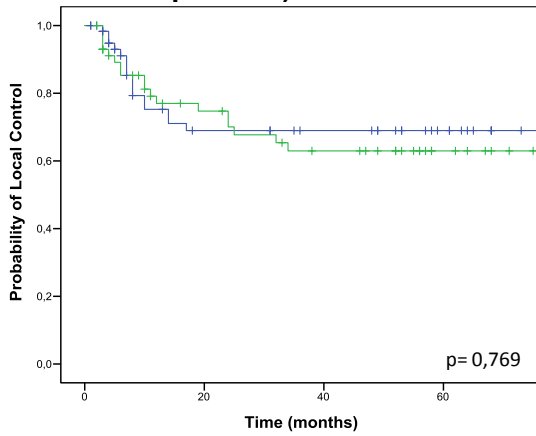

**Time period 4; median 68 min.**

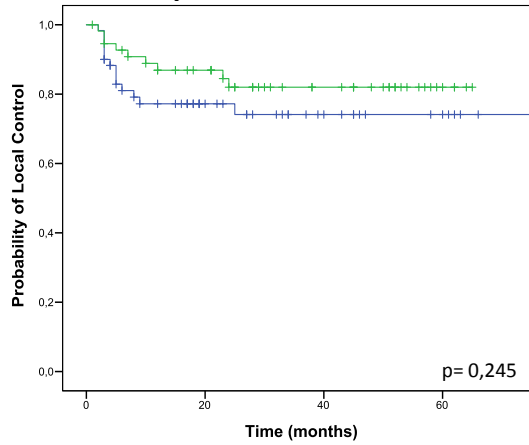

Supplement: Image_3.pdf [file Image_3.pdf]
